# Supplementary material for: Origin of ion selectivity at the air/water interface
Source: Royal Society of Chemistry journal article supplement (doi:10.1039/c4cp03338h), 2014-12-22
Supplement: c4cp03338h1.pdf [file c4cp03338h1.pdf]

## **Supporting Information**

### **Origin of Ion Selectivity at the Air/Water Interface**

Lu Sun, Xin Li, Yaoquan Tu, and Hans Ågren\*

Division of Theoretical Chemistry and Biology, School of Biotechnology, Royal Institute of Technology, S-10691 Stockholm, Sweden

**Table S1 Ionic Properties**

|                 | $R_{hy1}$<br>(nm) | $R_{hy2}$<br>(nm) | $N_{hb\_11}$ |           | $L_{hb}$ (Å) |           | $L_{cen}$ (Å) |           | D (Debye) |           | $\tau_{w\_w}$<br>(ps) |
|-----------------|-------------------|-------------------|--------------|-----------|--------------|-----------|---------------|-----------|-----------|-----------|-----------------------|
|                 |                   |                   | Bulk         | Interface | Bulk         | Interface | Bulk          | Interface | Bulk      | Interface |                       |
| Water           | 0.328             | 0.574             | 0.33         | 0.17      | 1.91         | 1.97      |               |           | 2.56      | 2.35      | 3.36                  |
| F <sup>-</sup>  | 0.328             | 0.567             | 0.3          | 0.21      | 1.82         | 1.78      | 0.55          | 0.90      | 1.36      | 1.76      | 3.59                  |
| Cl <sup>-</sup> | 0.365             | 0.604             | 0.4          | 0.21      | 2.29         | 2.25      | 0.87          | 1.39      | 2.06      | 2.56      | 3.42                  |
| Br <sup>-</sup> | 0.378             | 0.616             | 0.4          | 0.22      | 2.42         | 2.39      | 1.02          | 1.58      | 2.67      | 3.12      | 3.41                  |
| I <sup>-</sup>  | 0.396             | 0.635             | 0.5          | 0.21      | 2.64         | 2.62      | 1.15          | 1.85      | 3.24      | 3.75      | 3.36                  |
| Na <sup>+</sup> | 0.316             | 0.53              | 0.3          | 0.44      |              |           | 0.31          | 0.37      | 0.03      | 0.03      | 3.70                  |
| K <sup>+</sup>  | 0.356             | 0.562             | 1.5          | 1.70      |              |           | 0.40          | 0.49      | 0.12      | 0.13      | 3.59                  |
| Rb <sup>+</sup> | 0.374             | 0.584             | 2.5          | 2.72      |              |           | 0.44          | 0.59      | 0.18      | 0.20      | 3.59                  |
| Cs <sup>+</sup> | 0.416             | 0.596             | 4.9          | 4.95      |              |           | 0.49          | 0.69      | 0.27      | 0.32      | 3.65                  |

$R_{hy1}$  and  $R_{hy2}$  are the places where first and second solvation shell end.  $N_{hb\_11}$  is the number of hydrogen bonds formed between water in first hydration shell.  $L_{hb}$  is the hydrogen bond length.  $L_{cen}$  is the distance from ion to the mass center of first solvation shell water. D is the dipole moment.  $\tau_{w\_w}$  denotes the average lifetime of water-water hydrogen bond. A hydrogen-bond is formed if the water is in the first solvation shell and the O-H-A(A denotes the hydrogen acceptor) angle is over 130°.

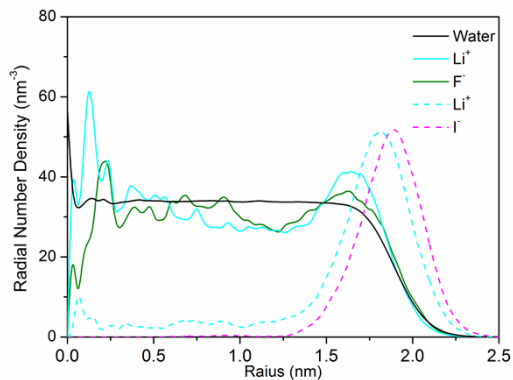

(a)

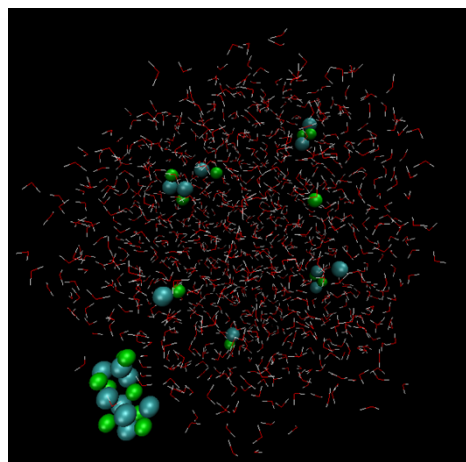

(b)

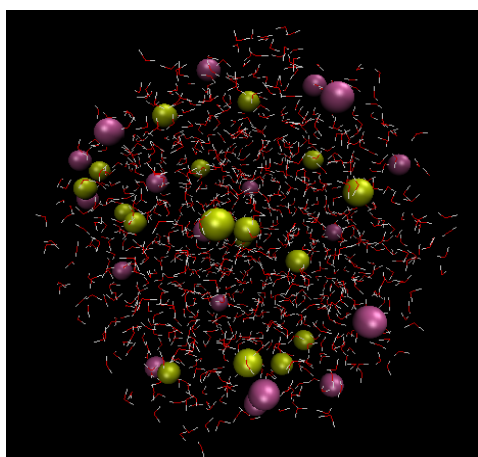

(c)

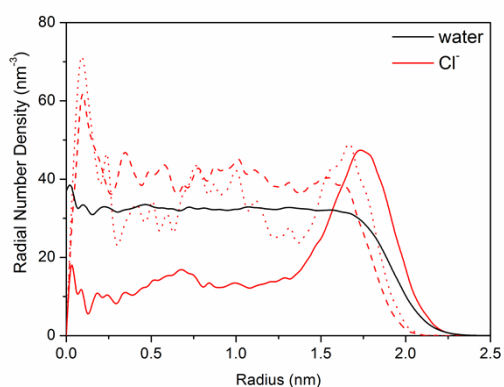

(d)

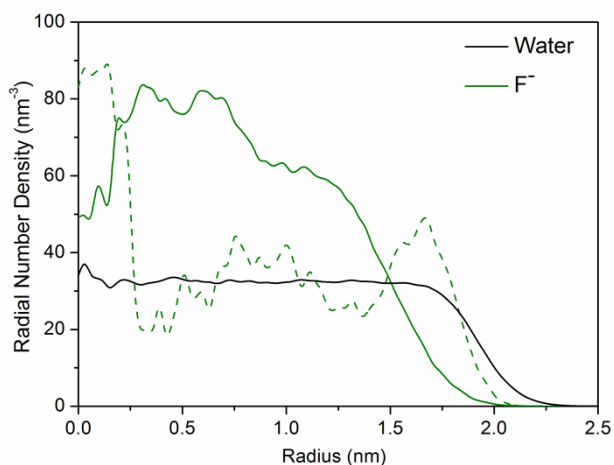

(e)

Figure S1. (a) The strong electrostatic attraction and weak Pauli repulsion make the smallest cation  $\text{Li}^+$  hard to dissociate. (b) Snapshot of  $\text{LiF}$  in the water cluster with  $\text{Li}^+$  and  $\text{F}^-$  denoted as cyan and green balls. (c) Snapshot of  $\text{KF}$  in the water cluster with  $\text{K}^+$  and  $\text{I}^-$  denoted as yellow and purple balls. (d) Polarization influences the distribution of  $\text{Cl}^-$ . The solid, dashed, and dotted lines represent the number densities of  $\text{Cl}^-$  with the polarizability of  $0.003969 \text{ nm}^{-3}$ ,  $0.001786 \text{ nm}^{-3}$ , and  $0.0 \text{ nm}^{-3}$ , respectively. (e) With the polarizability of  $\text{F}^-$  increased from  $0.001786 \text{ nm}^{-3}$  (solid line) to  $0.003969 \text{ nm}^{-3}$  (dashed line),  $\text{F}^-$  ions get much closer to the interface.

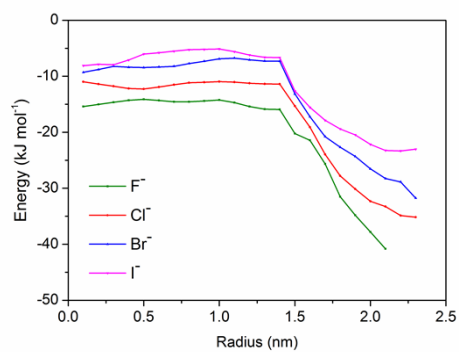

(a)

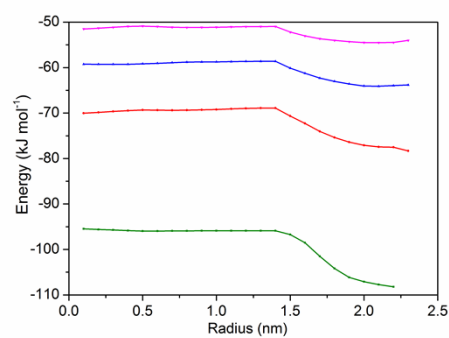

(b)

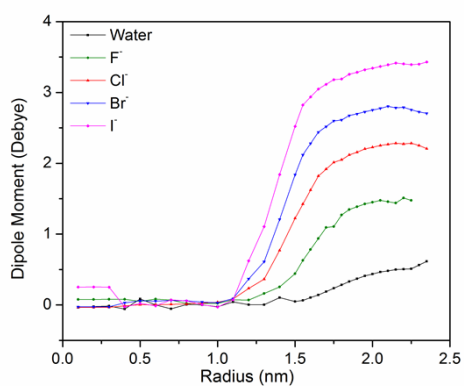

(c)

Figure S2. Interaction energies of anions with (a) non-hydrogen-bonded and (b) hydrogen-bonded water in the first hydration shell of anions.(c) The normal component of dipole moment of anions. Here  $K^+$  is the cation.

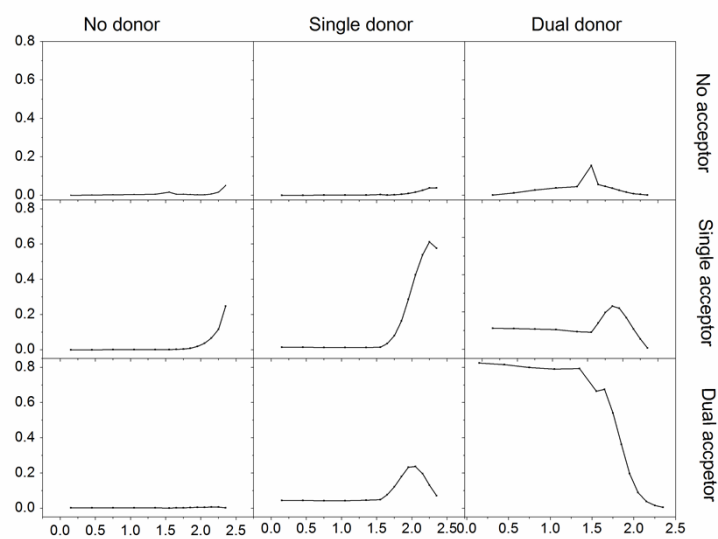

Figure S3. Hydrogen bonds formation among water. Most of water in the bulk is fully bonded. It's interesting that dual-donor no-acceptor water increase most prompt to react to the breaking of water-water hydrogen bonds, resulting water donating a little more than it accepts somewhat beneath the interface.

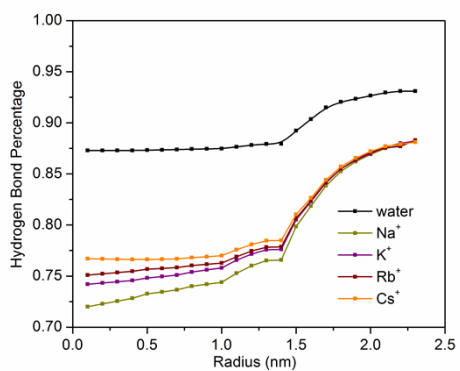

(a)

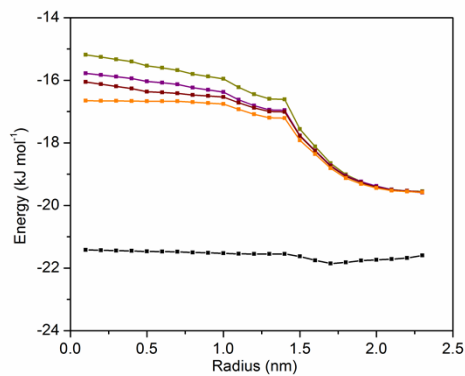

(b)

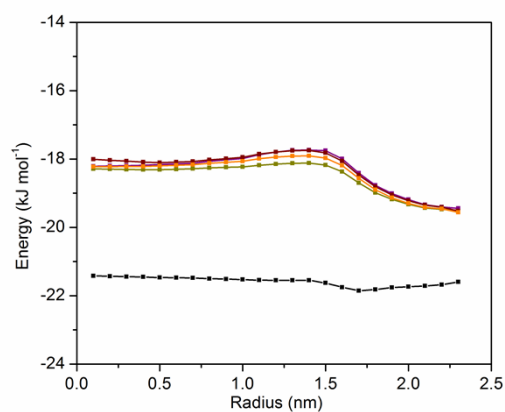

(c)

Figure S4. Water structure affected by cations. (a) The decreasing water-water hydrogen bond percentage with F<sup>-</sup> as anions. Average interaction energy between a water molecule and its solvation shell, with the counterion as (b) F<sup>-</sup> or (c) I<sup>-</sup>. The cations also follow the rule the smaller the more influential. But the influence is not as significant as anions.
